# Supplementary material for: C1GalT1 expression reciprocally controls tumour cell-cell and tumour-macrophage interactions mediated by galectin-3 and MGL with double impact on cancer development and progression
Source: Springer Nature journal article supplement (doi:10.1038/s41419-023-06082-7), 2023-08-23
Supplement: MOESM1 [file 41419_2023_6082_MOESM1_ESM.pdf]

**Table S1. Eggs with and without detectable tumour at day 14 embryonation in Chick embryo after tumour cell implantation**

|                  | Eggs with tumour /Total<br>eggs | Eggs without tumour /Total<br>eggs | p value |
|------------------|---------------------------------|------------------------------------|---------|
| SW620shCon       | 24/42                           | 18/42                              | 0.001   |
| SW620shC1GT      | 8/42                            | 34/42                              |         |
| SW620shCon+Gal3  | 8/24                            | 16/24                              | 0.011   |
| SW620shC1GT+Gal3 | 3/24                            | 21/24                              |         |

**Table S2. Cell membrane proteins extracted by galectin-3 and MGL from both SW620shcon and SW620shC1GalT1 cells**

| Cell membrane proteins extracted by galectin-3 from both SW620shCon and SW620shC1GT cells | Cell membrane proteins extracted by MGL from both SW620shCon and SW620shC1GT cells |
|-------------------------------------------------------------------------------------------|------------------------------------------------------------------------------------|
| 14-3-3 protein                                                                            | Annexin A1                                                                         |
| Annexin A1                                                                                | Annexin A2                                                                         |
| Annexin A2                                                                                | Annexin A3                                                                         |
| Annexin A3                                                                                | CD98 antigen                                                                       |
| CD98 antigen                                                                              | Clathrin heavy chain 1                                                             |
| Ep-CAM                                                                                    | Complement component 1 Q subcomponent-binding protein                              |
| Galectin-1                                                                                | Dnj3                                                                               |
| Galectin-3-binding protein                                                                | eIF-2gX                                                                            |
| HMG-2                                                                                     | Extended synaptotagmin-1                                                           |
| HMGA1                                                                                     | FAU ubiquitin-like and ribosomal protein S30                                       |
| LAMP-1                                                                                    | G25K GTP-binding protein                                                           |
| LAMP-2                                                                                    | Galectin-1                                                                         |
| LCP-1                                                                                     | Galectin-3                                                                         |
| MCT 4                                                                                     | Galectin-3-binding protein p105                                                    |
| Membrane-associated progesterone receptor component 1                                     | Magnesium transporter protein 1                                                    |
| Moesin                                                                                    | MCT 1                                                                              |
| p27RF-Rho                                                                                 | MCT 4                                                                              |
| p59-Fyn                                                                                   | Moesin                                                                             |
| Prohibitin-2                                                                              | Multifunctional protein ADE2                                                       |
| Protein S100-A10                                                                          | MYH-1c                                                                             |
| Protein S100-A6                                                                           | Parkinson disease protein 7                                                        |
| Receptor of activated protein C kinase 1                                                  | Plastin-2                                                                          |
| SLC12A2                                                                                   | Protein S100-A4                                                                    |
| Spectrin alpha chain, non-erythrocytic 1                                                  | Receptor of activated protein C kinase 1                                           |
| Spectrin beta chain, non-erythrocytic 1                                                   | ZO-1                                                                               |
| Src substrate cortactin                                                                   |                                                                                    |
| Vimentin                                                                                  |                                                                                    |

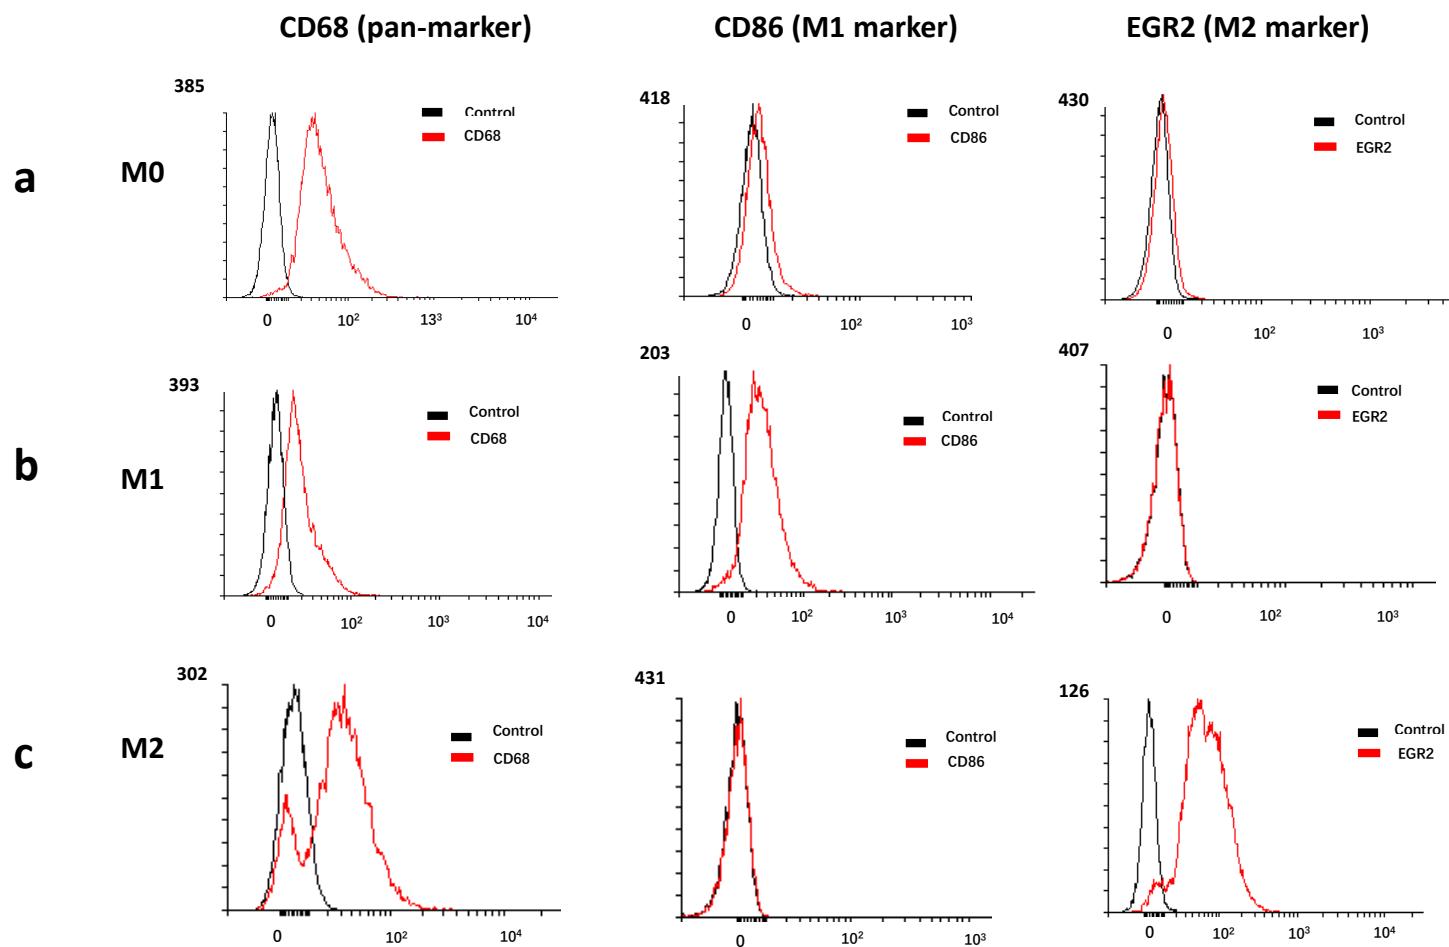

**Figure S1. Confirmation of THP-1 macrophage differentiation.** THP-1 cells were incubated with 10 ng/ml PMA for 48 h at 37°C. The cells were released with NECDs, washed once with PBS and fixed with 2% formaldehyde for 30 min. After two washes with PBS, the cells ( $5 \times 10^5$  cells/ml) were incubated with 1% BSA/PBS for 20 min before incubation with PE-conjugated antibodies against pan-macrophage marker CD68, M1 macrophage marker CD86 and M2 macrophage marker EGR2 and analysed by flow cytometry (a). THP-1 differentiated M0 macrophages were treated with 50 ng/ml IFN- $\gamma$  and 100 pg/ml LPS for 24 h before analysed by flow cytometry for expression of macrophage markers (b). THP-1 differentiated M0 macrophages were treated with 60 ng/ml IL-4 for 72 h before analysed by flow cytometry for expression of macrophage markers (c). Representative flow cytometry histograms from three independent analysis are shown.

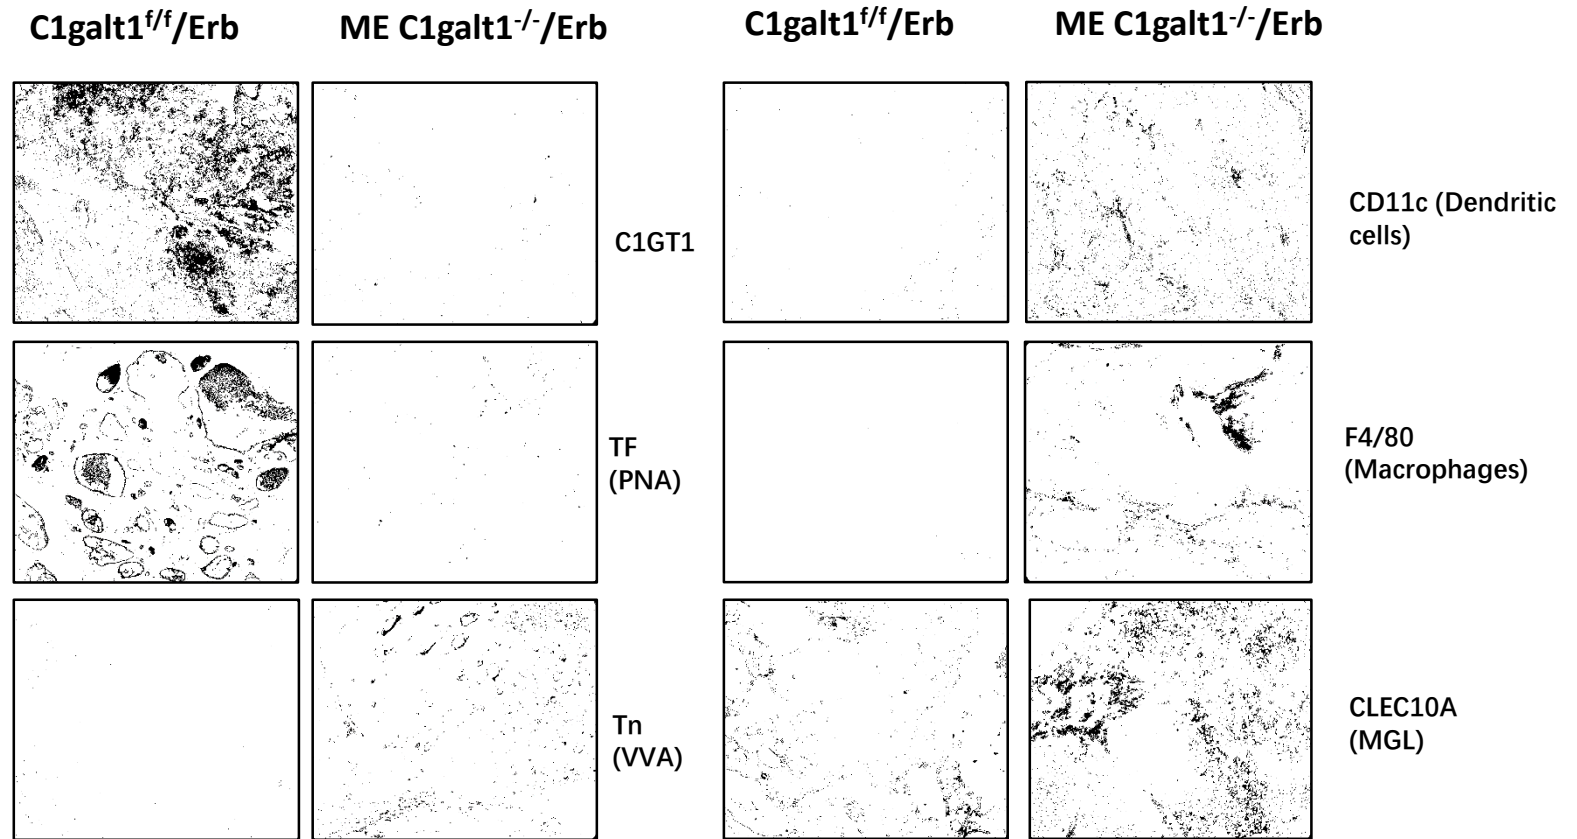

**Figure S2. Binary images in evaluation of macrophage and DC tumour infiltration.** Immunohistochemistry images of the mice sections were quantified using Fiji Image J. The final binary images of Fig 7 c (left panel) and d (right panel) were shown as example here.
